# Supplementary material
Source: PubMed Central journal article supplement (PMC7239718)

# **Supplementary Appendix 3 – Answers to Exit Survey Questions by Study Arm**

# How much longer would you be willing to participate in the study if given the opportunity?

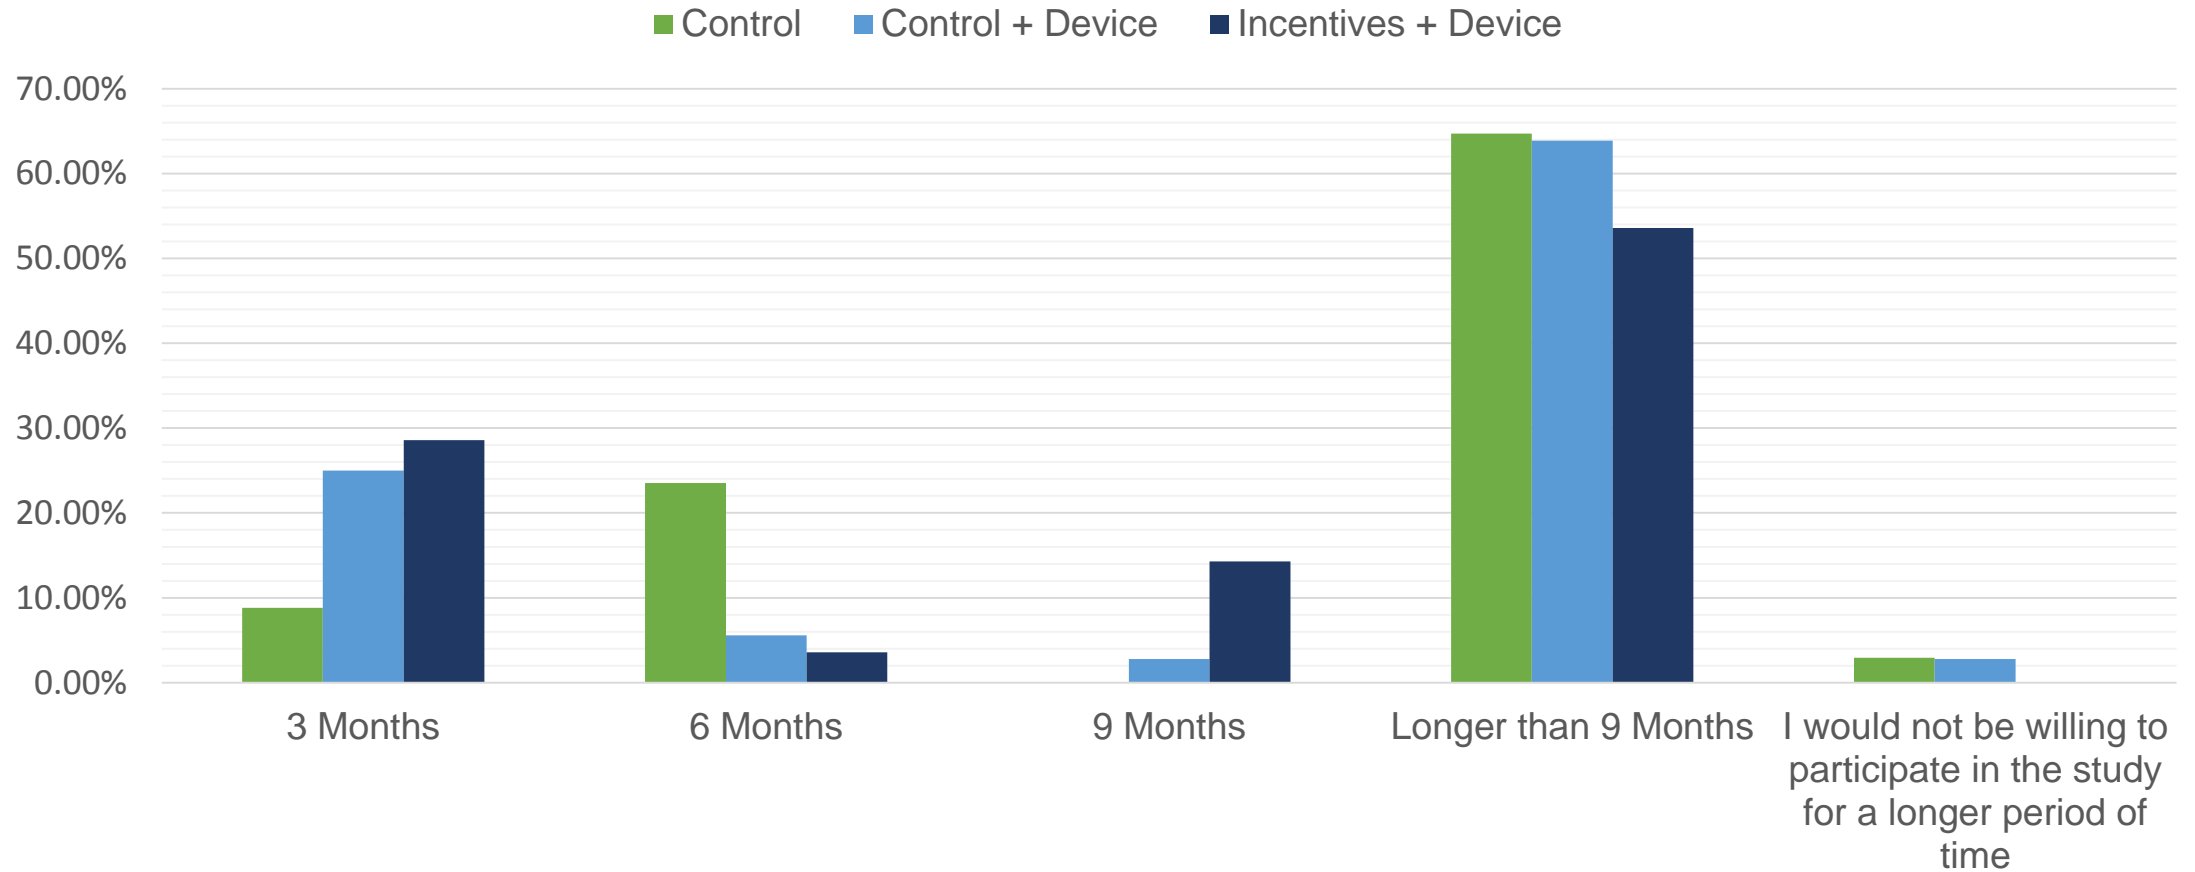

# I enjoyed participating in this study

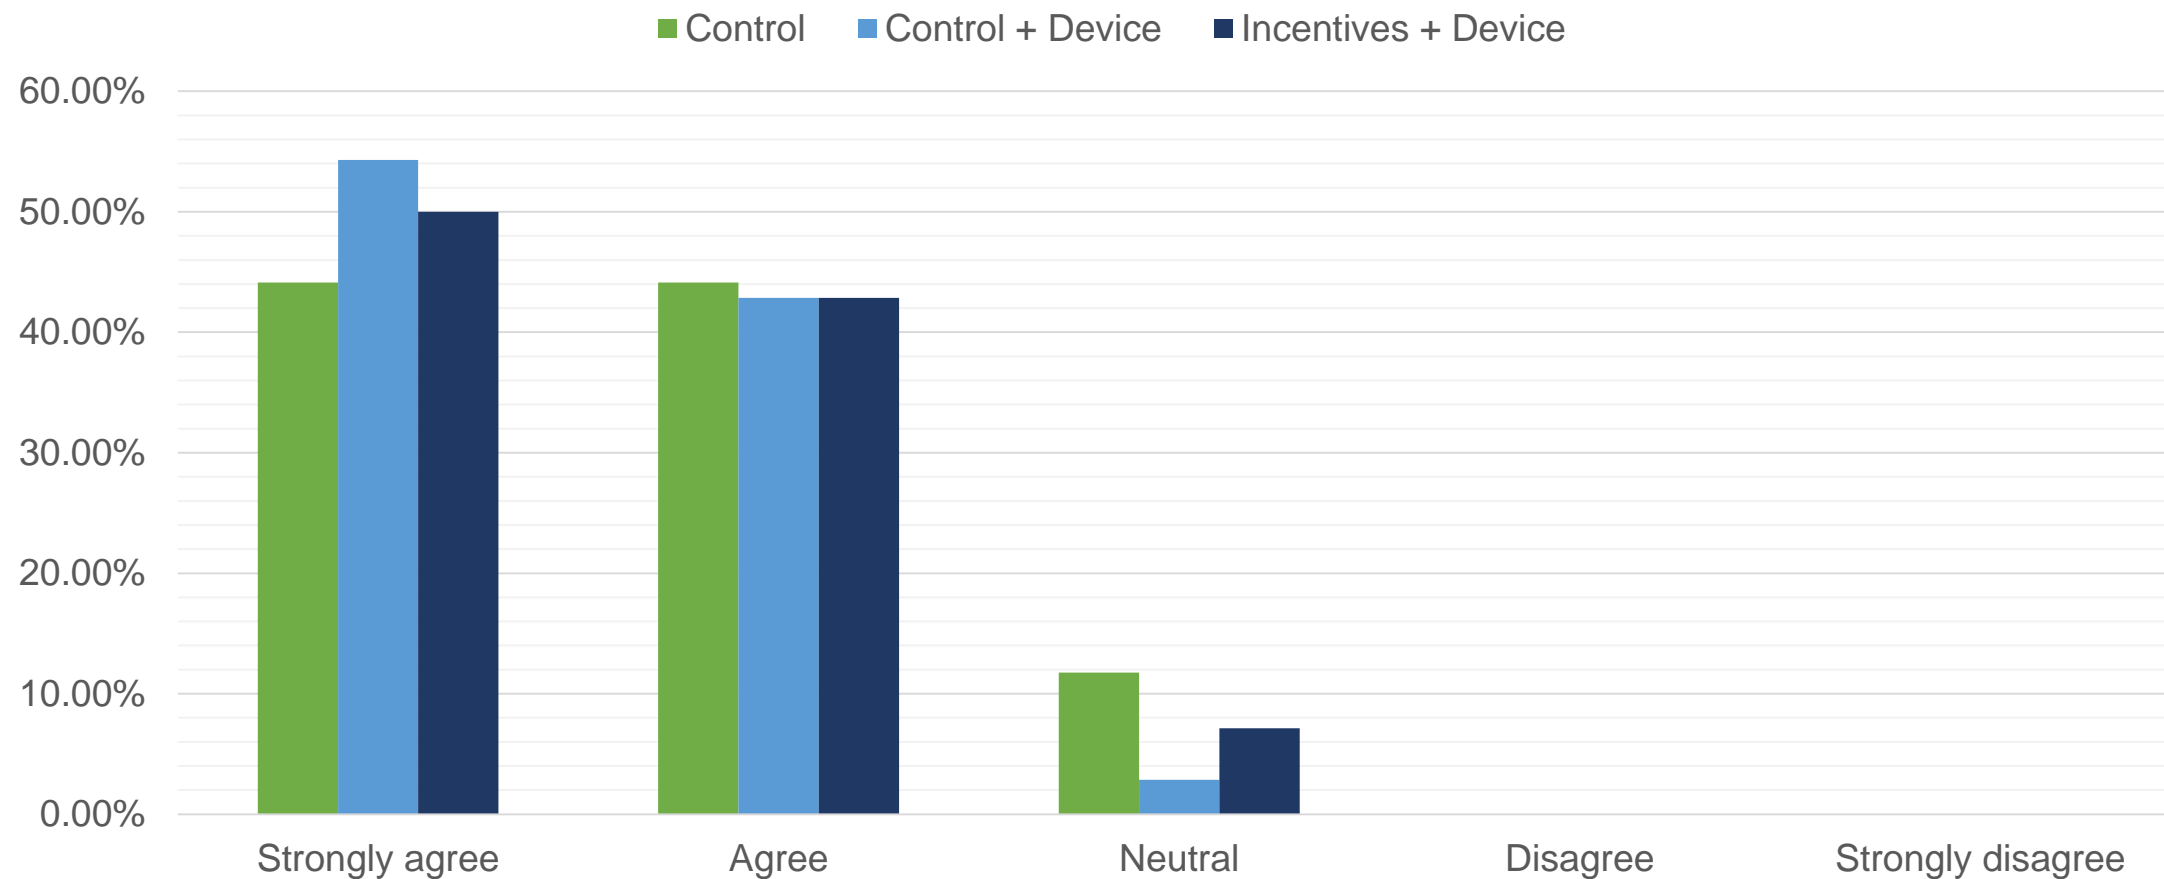

# This study has helped to increase my physical activity

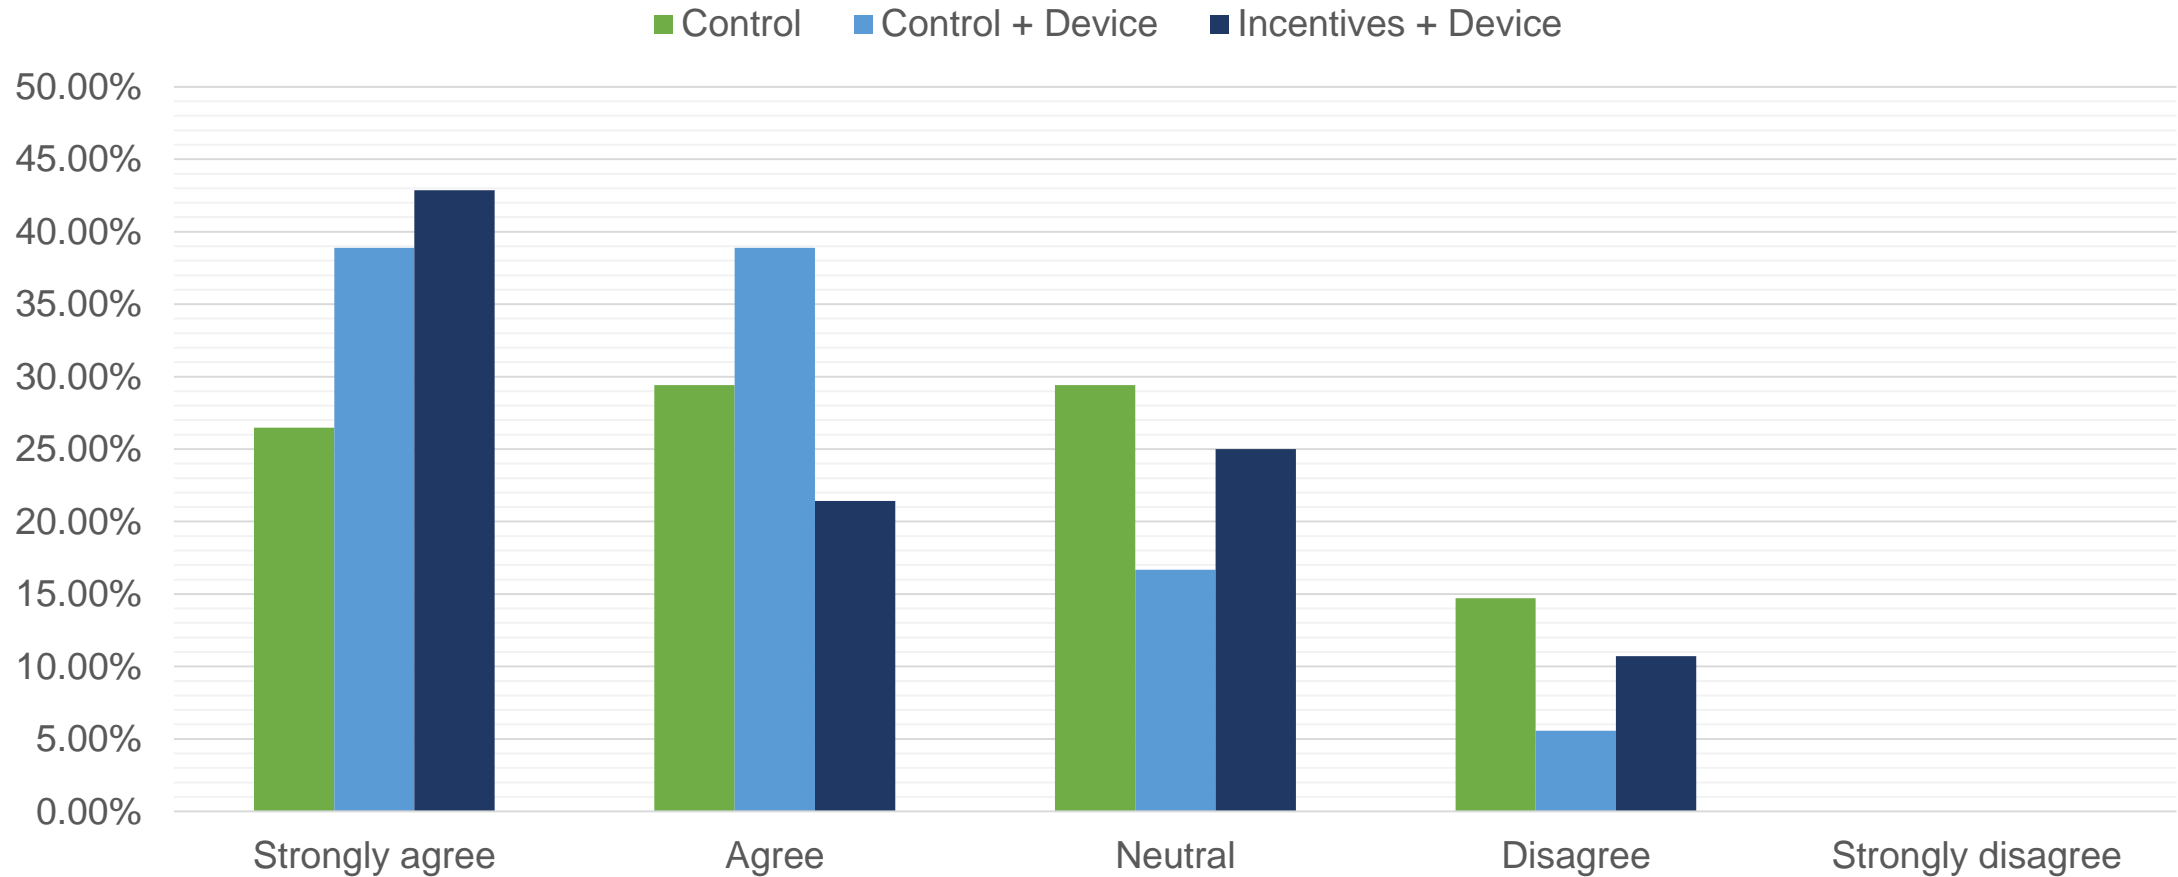

# This study helped me keep a healthy diet

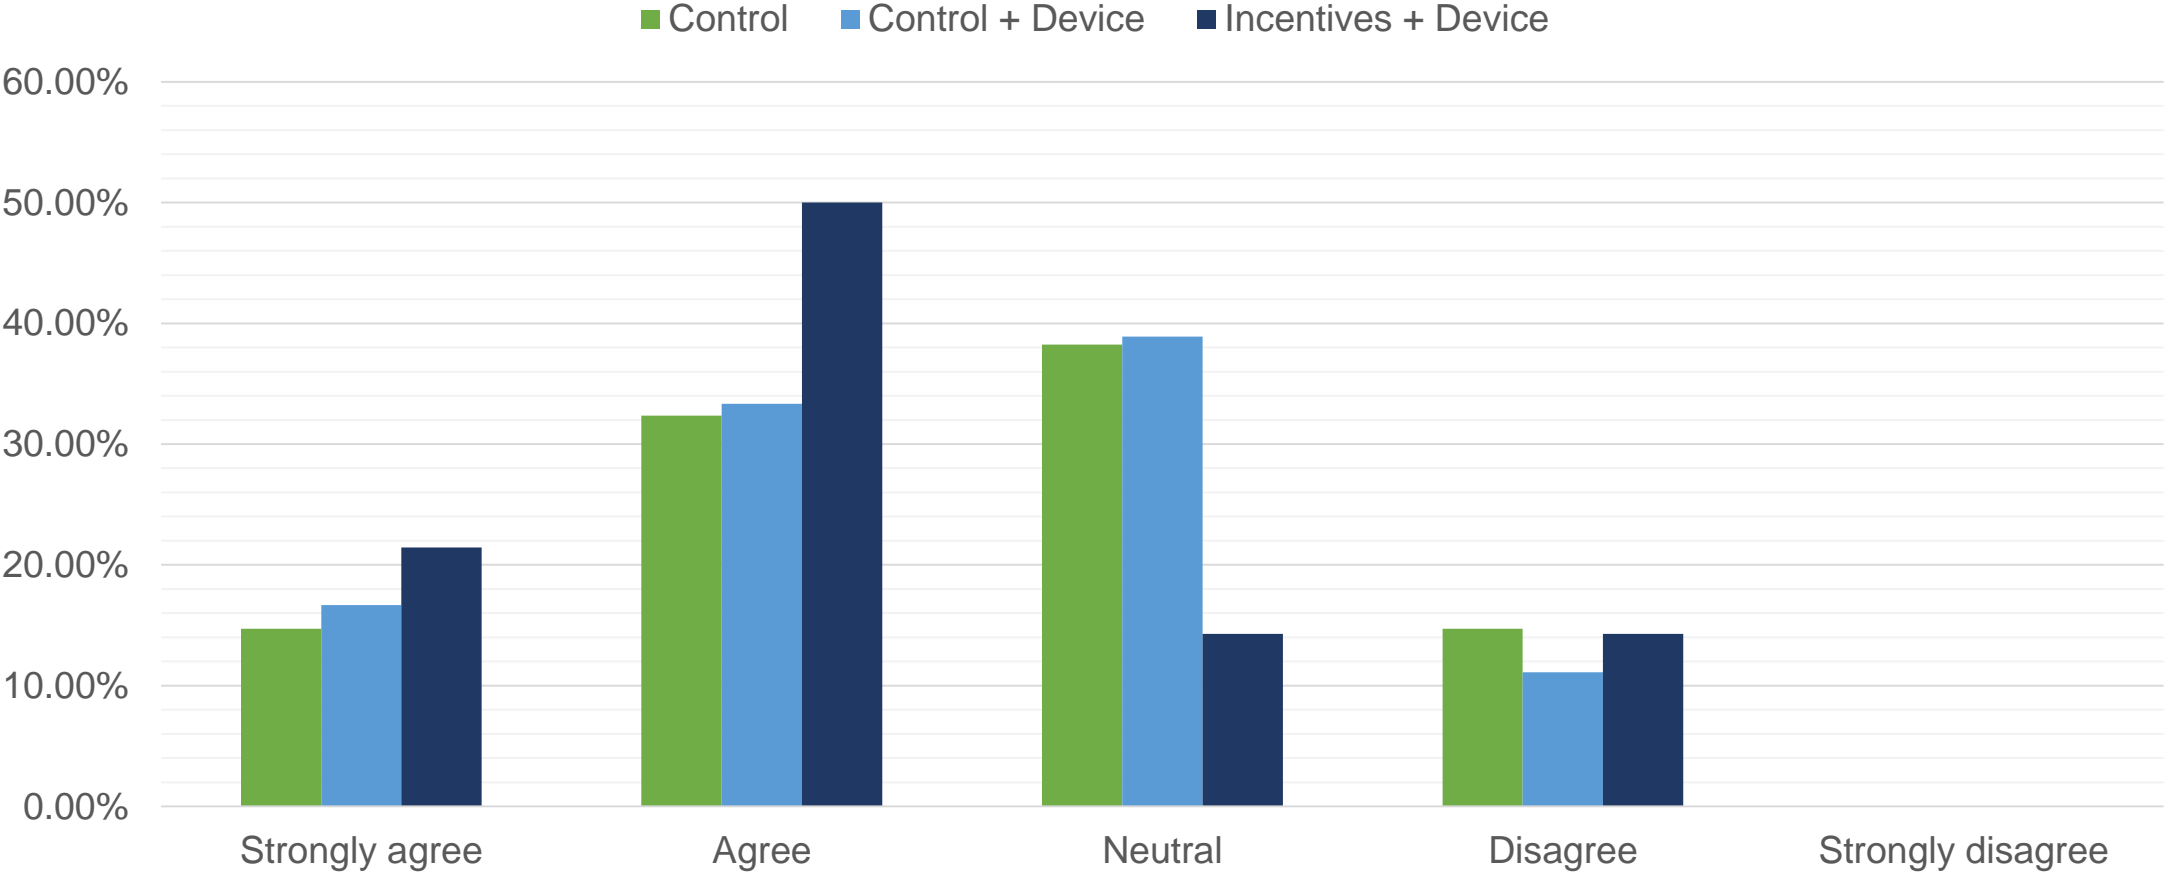

# This study has helped to improve my health

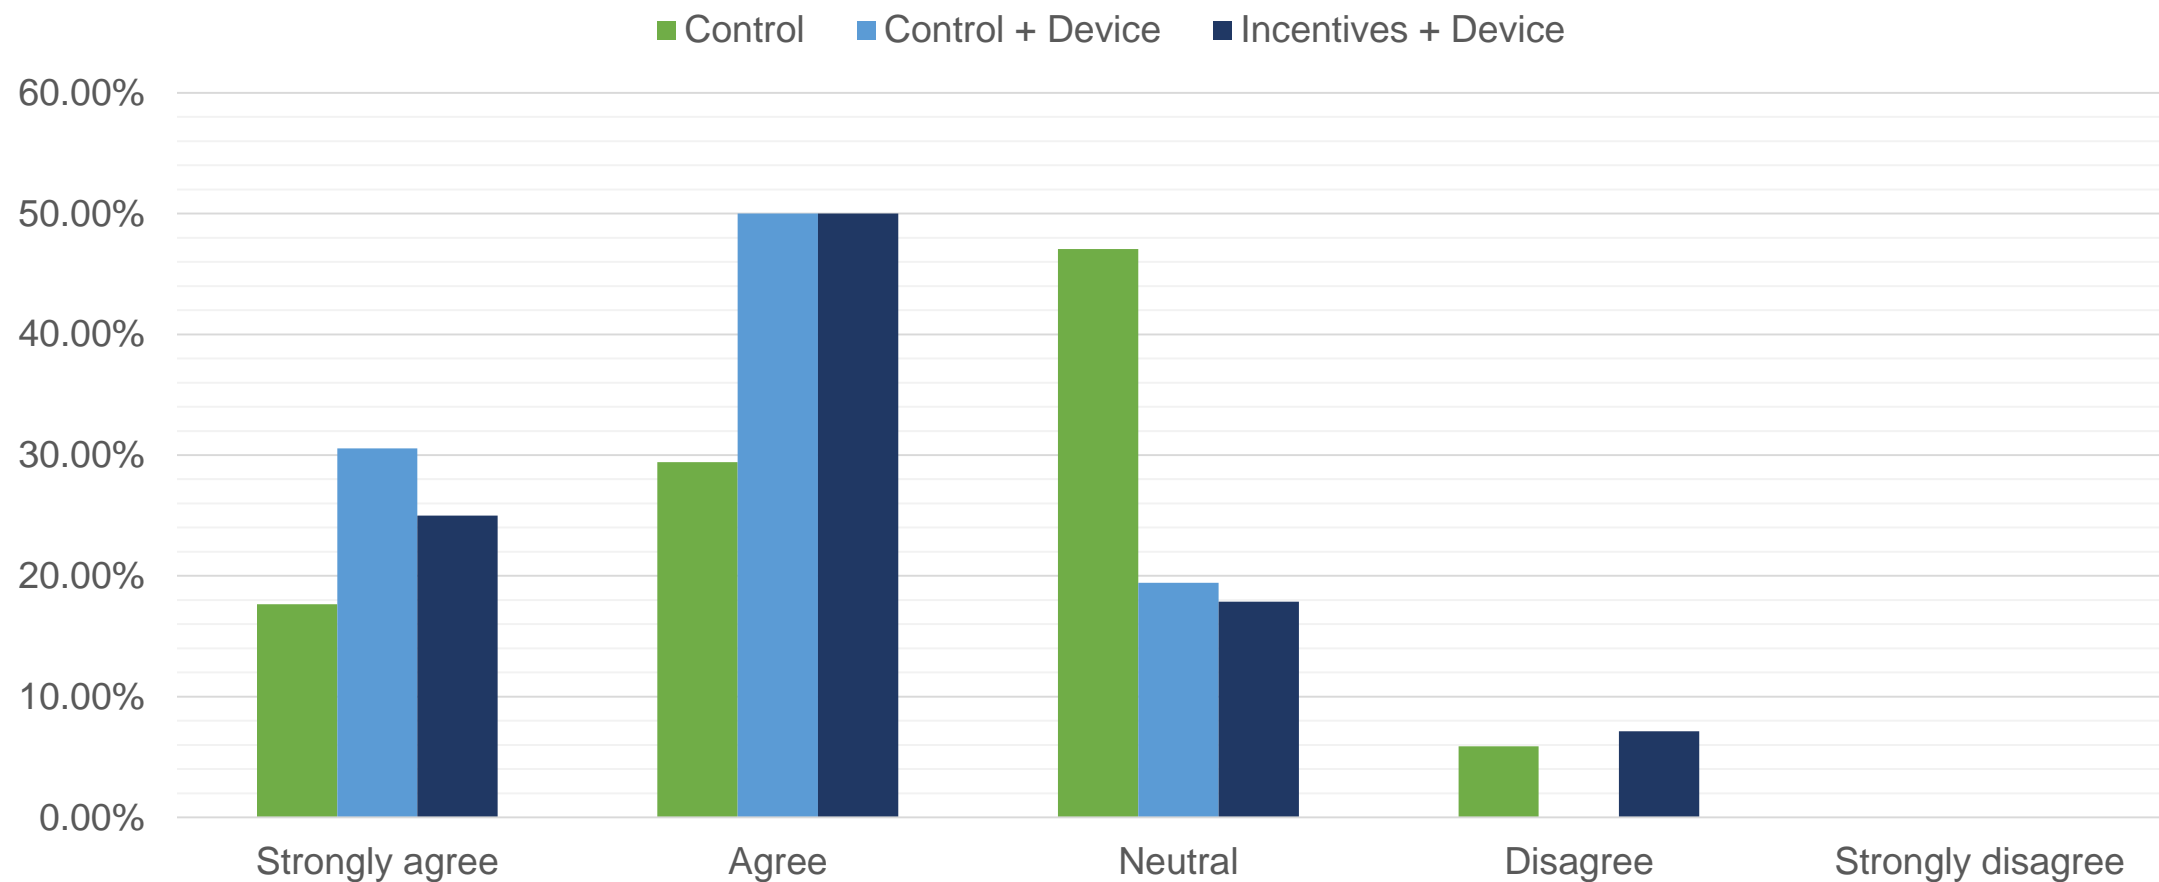

# I am committed to walking for exercise every day

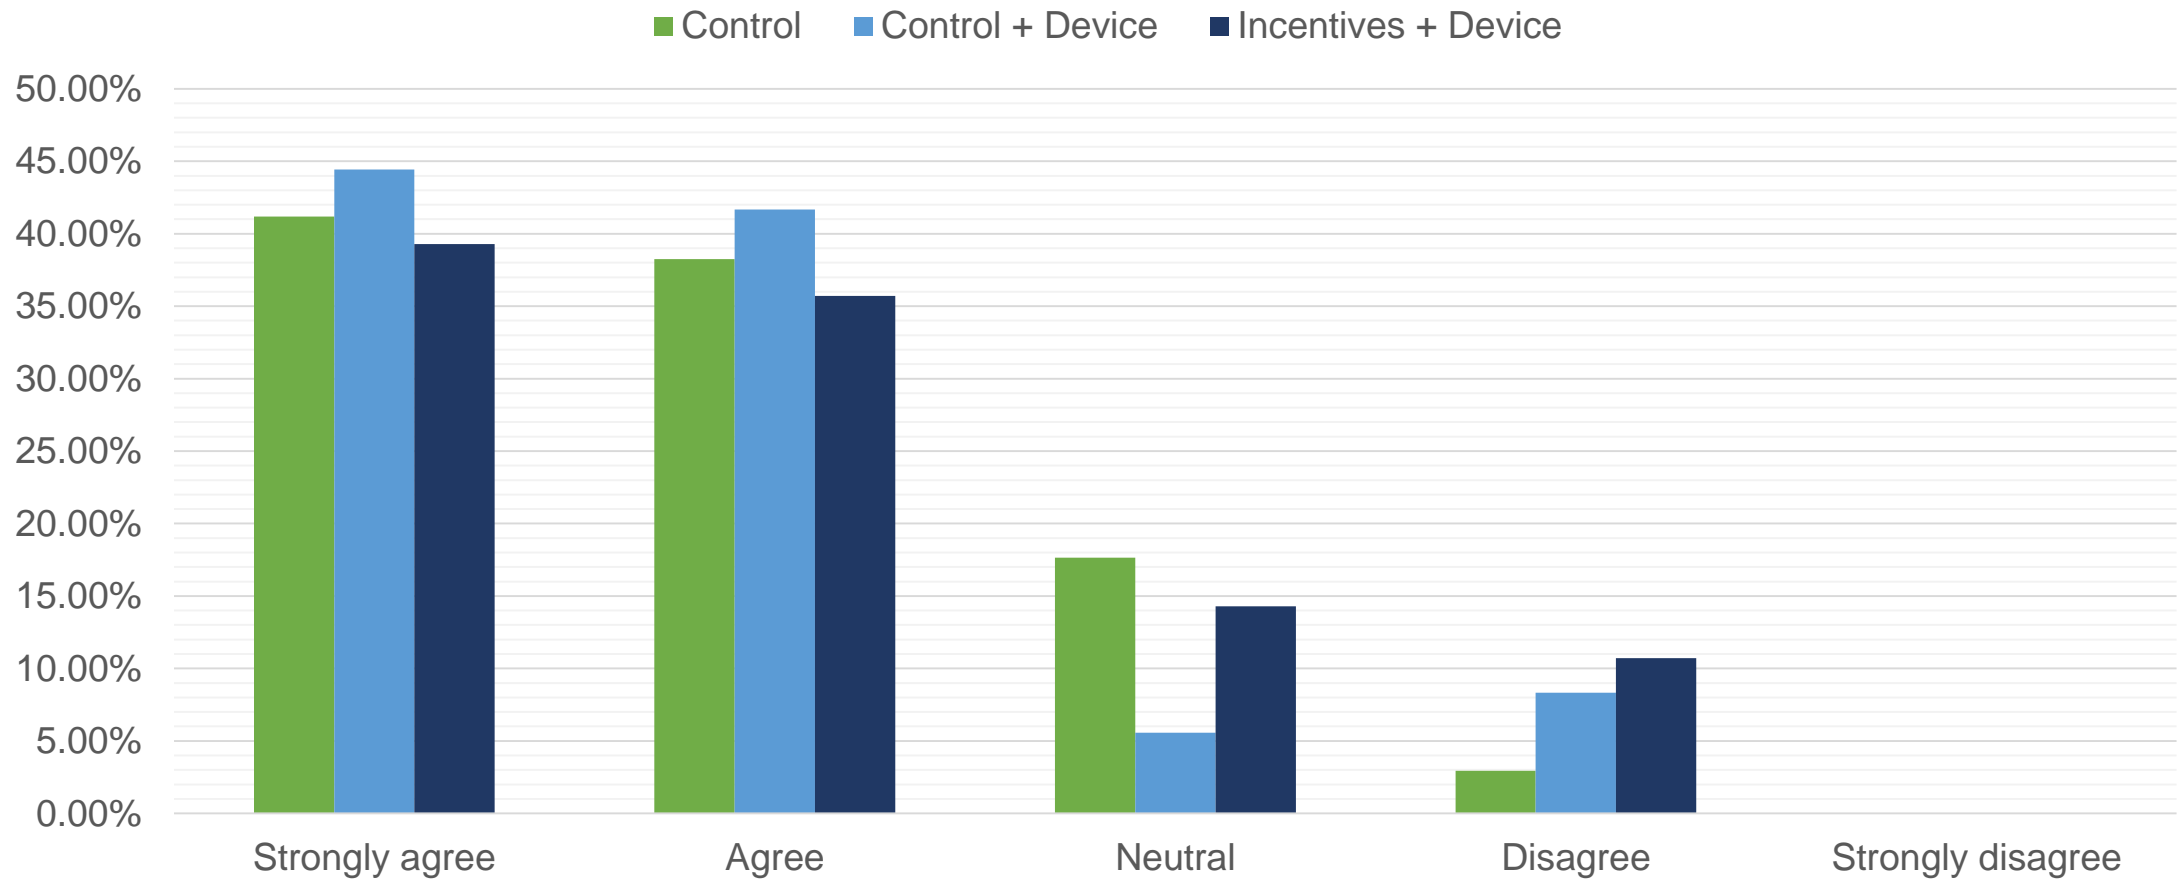

# The device helped me improve my health (device arms only)

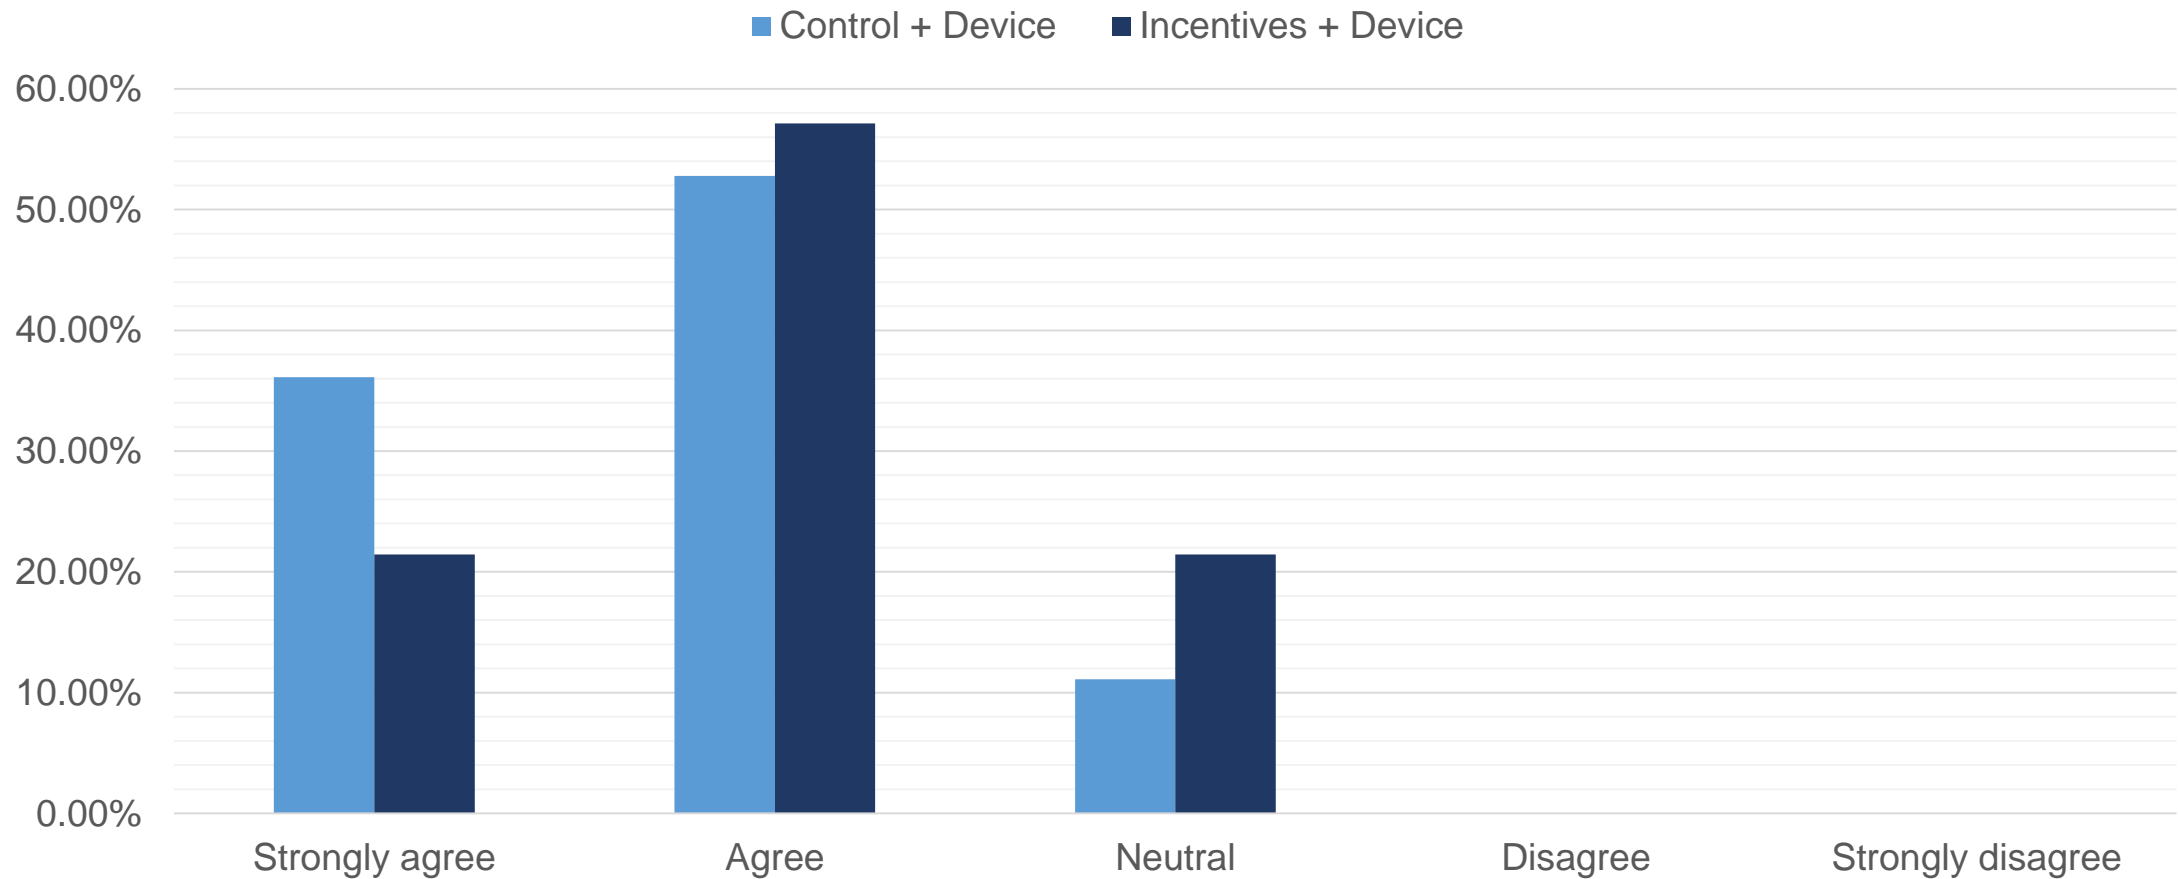



The text messages with questions that I received as part of this study were helpful to me (incentives + device arm only)

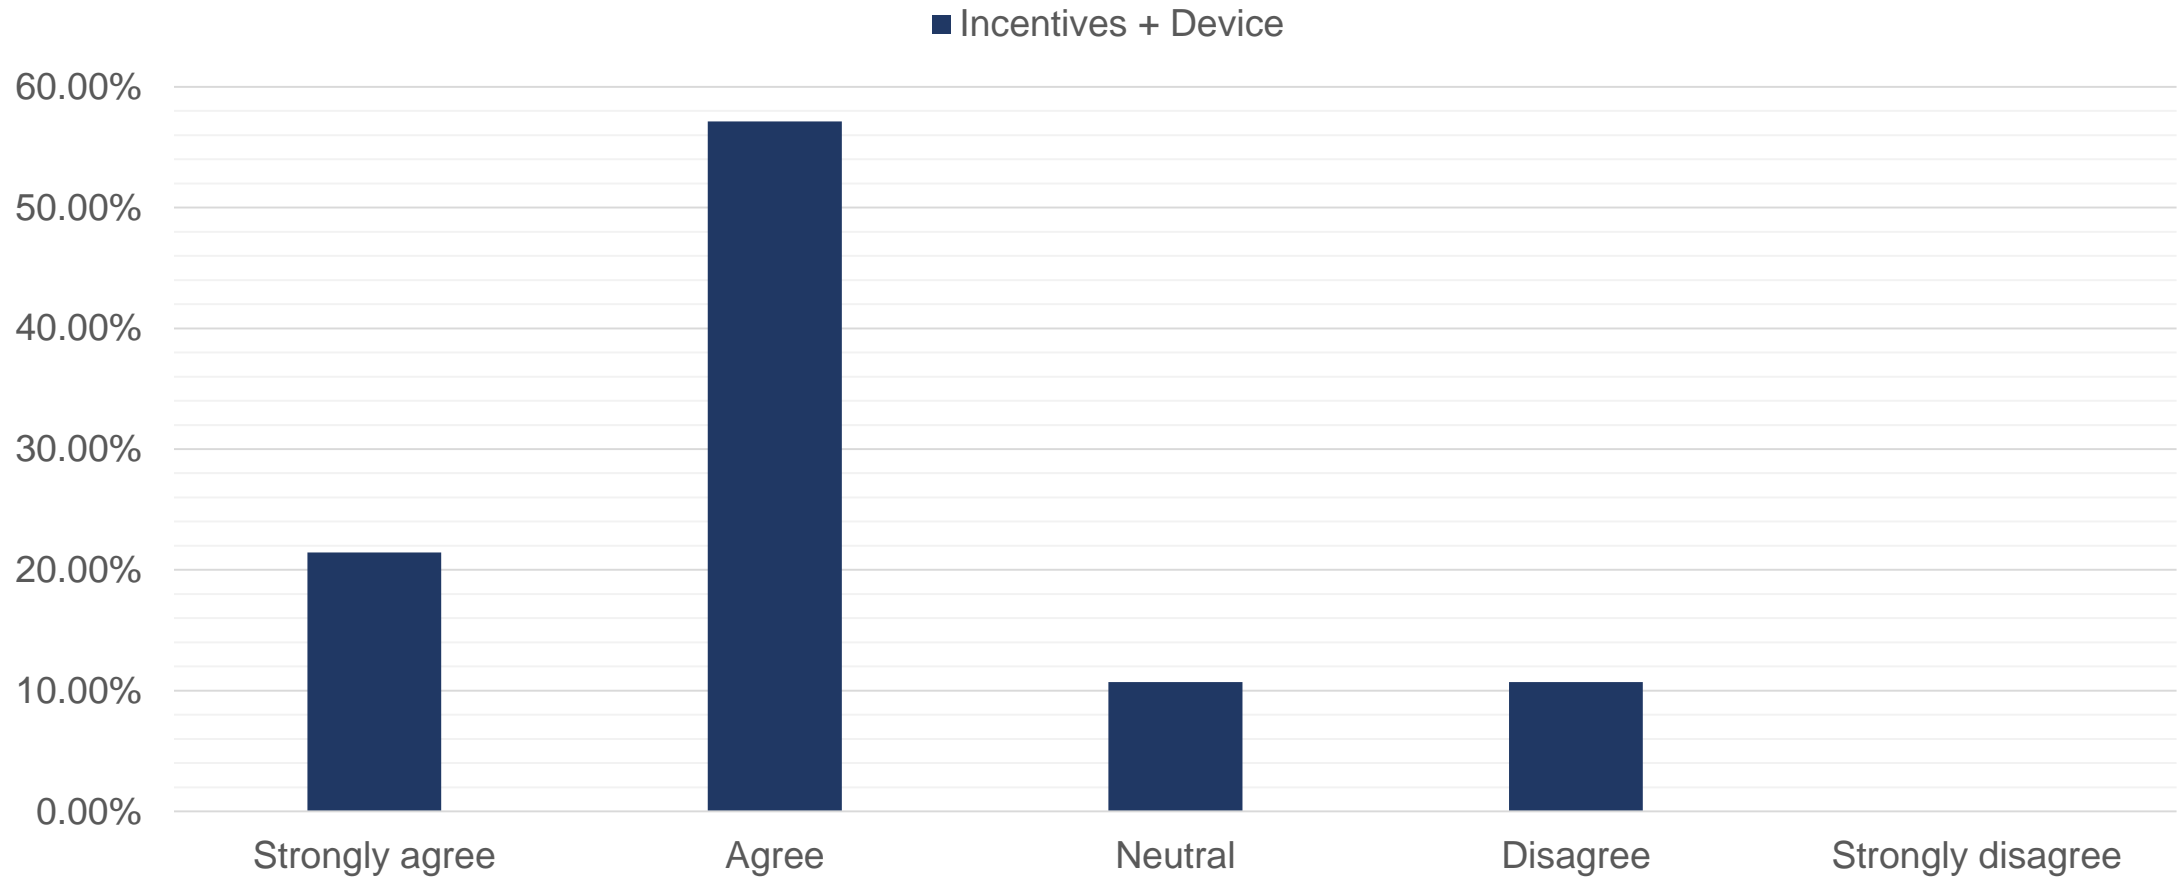

Supplement: NIHMS1067592-supplement-Supp_AppendixS3.pdf [file NIHMS1067592-supplement-Supp_AppendixS3.pdf]
